# Supplementary material
Source: PubMed Central journal article supplement (PMC7508577)
Supplement: AAC.01057-20-s0001.pdf [file AAC.01057-20-s0001.pdf]

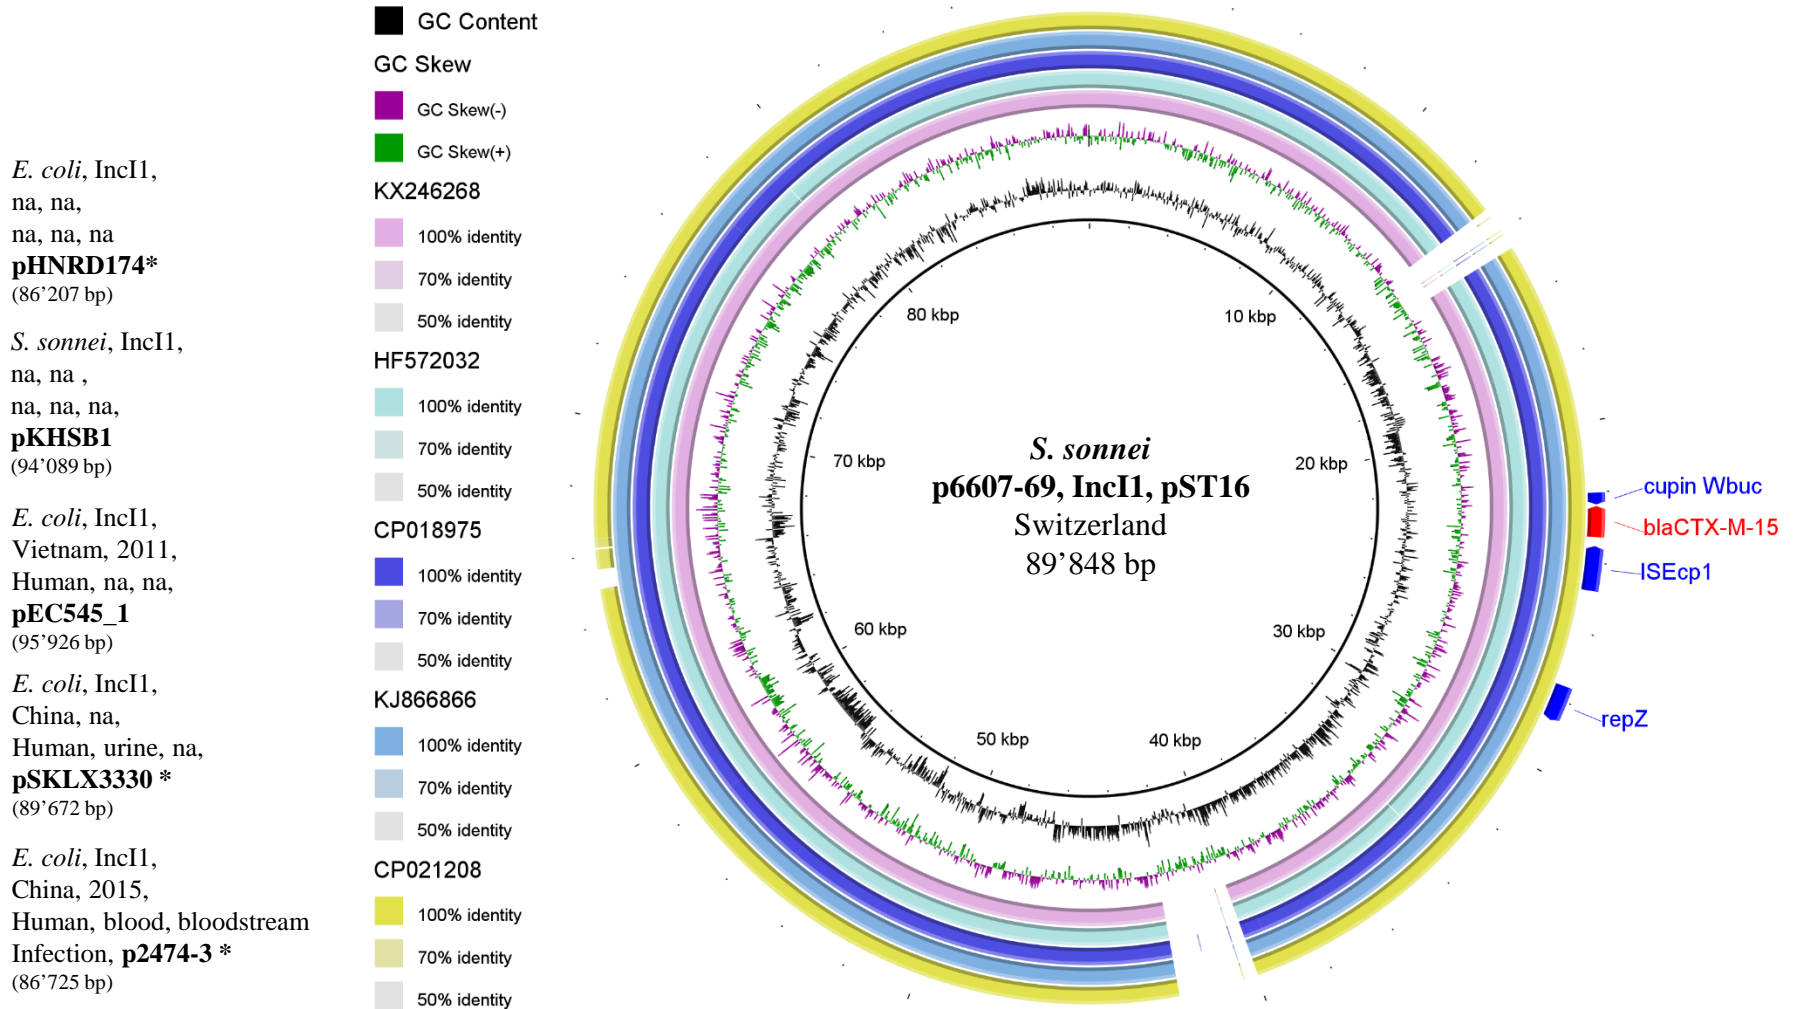

**Figure S1.** BLAST comparisons of *S. sonnei* *bla*<sub>CTX-M-15</sub> carrying IncI1 plasmid against five best overall-match plasmids. Rings were constructed using BRIG (BLAST Ring Image Generator) v0.95 software using p6607-69 (GenBank: [CP045527.2](#)) as reference sequence. Similarities with the reference plasmid are represented by the colored rings. From the center to outside: p6607-69, GC content, GC skew, pHNRD174, pKHSB1, pEC545\_1, pSKLX3330, p2474-3. Genome accession numbers are indicated in the legend. Red and blue arrows above the rings correspond to gene features of interest. For each plasmid, we report species of isolation, Inc group plasmid, country, year, host, sample of isolation, disease, plasmid name, and plasmid size. For plasmid names ending with asterisk (\*), the  $\beta$ -lactamase gene is *bla*<sub>CTX-M-55</sub>. Not available = na.

*E. coli*, IncFII,  
Canada, 2000,  
Human, na, na  
**pC15-1a\***  
(92'353 bp)

*K. pneumoniae*, IncFII,  
na, na,  
na, na, na,  
**Plasmid unnamed4 \***  
(85'410 bp)

*K. pneumoniae*, IncFII,  
Norway, 2015,  
Human, blood, na,  
**Plasmid unnamed3 \***  
(89'709 bp)

*E. coli*, IncFII,  
Sweden, 2008,  
Human, blood, na,  
**pSUH-2 \***  
(79'945 bp)

*E. coli*, IncFII/IncN,  
USA, na,  
na, na, na  
**p94-1 \***  
(119'184 bp)

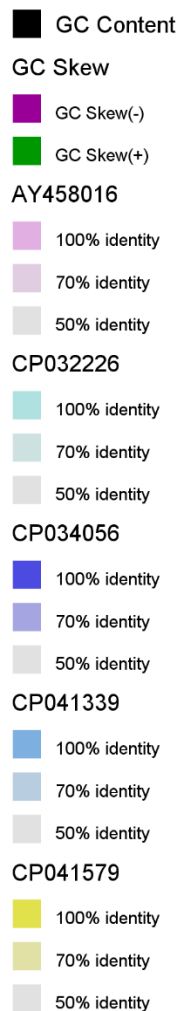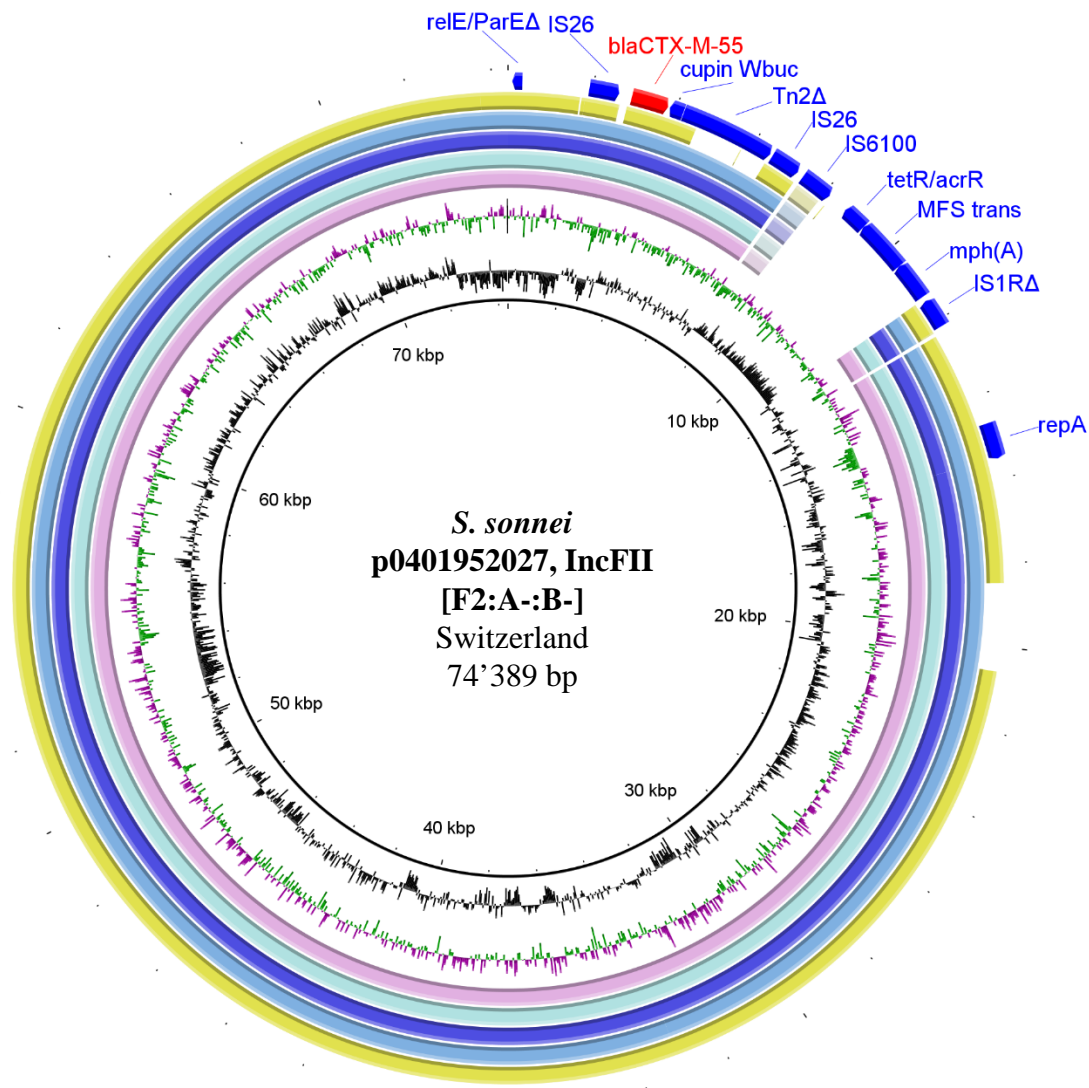

**Figure S2.** BLAST comparisons of *S. sonnei*  $bla_{CTX-M-55}$  carrying IncFII plasmid against five best overall-match plasmids. Rings were constructed using BRIG (BLAST Ring Image Generator) v0.95 software using p0401952027 (GenBank: CP049166) as reference sequence. Similarities with the reference plasmid are represented by the colored rings. From the center to outside: p0401952027, GC content, GC skew, pC15-1a, unnamed4, unnamed3, pSUH-2, p94-1. Genome accession numbers are indicated in the legend. Delta symbol ( $\Delta$ ) next to feature label corresponds to partial/incomplete gene CDS. Red and blue arrows above the rings correspond to gene features of interest. For each plasmid, we report species of isolation, Inc group plasmid, country, year, host, sample of isolation, disease, plasmid name, and plasmid size. For plasmid names ending with asterisk (\*), the  $\beta$ -lactamase gene is  $bla_{CTX-M-15}$ . Not available = na.

*E. coli*, IncFII,  
UAE, 2012,  
Human, na, na  
**pEC743\_3**  
(65'196 bp)

*Citrobacter* sp. CRE-46, IncFII,  
na, na,  
na, na, na,  
**Plasmid unnamed6**  
(76'953 bp)

*S. flexneri*, IncFII,  
na, na,  
na, na, na,  
**p2013C-3749-1**  
(71'053 bp)

*E. coli*, IncFII/IncN,  
na, na,  
na, na, na,  
**pMG333**  
(134'435 bp)

*E. coli*, IncFII,  
na, na,  
na, na, na  
**pMG335**  
(73'874 bp)

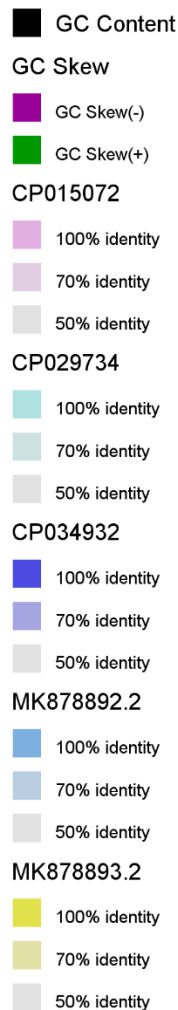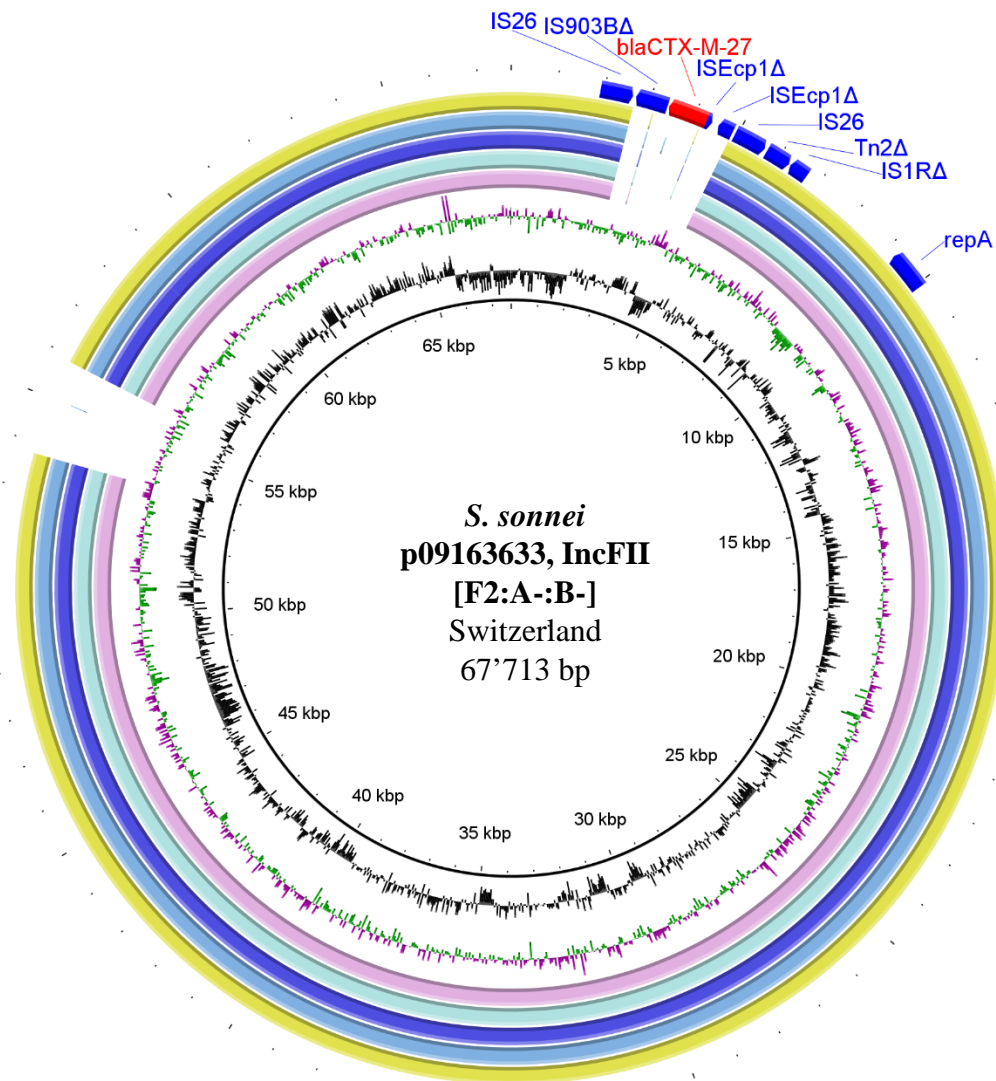

**Figure S3.** BLAST comparisons of *S. sonnei* *bla*<sub>CTX-M-27</sub> carrying IncFII plasmid against five best overall-match plasmids. Rings were constructed using BRIG (BLAST Ring Image Generator) v0.95 software using p09163633 (GenBank: [CP049168](#)) as reference sequence. Similarities with the reference plasmid are represented by the colored rings. From the center to outside: p09163633, GC content, GC skew, pEC743\_3, unnamed6, p2013C-3749-1, pMG333, pMG335. Genome accession numbers are indicated in the legend. Red and blue arrows above the rings correspond to gene features of interest. Delta symbol (Δ) next to feature label corresponds to partial/incomplete gene CDS. For each plasmid, we report species of isolation, Inc group plasmid, country, year, host, sample of isolation, disease, plasmid name, and plasmid size. Not available = na.

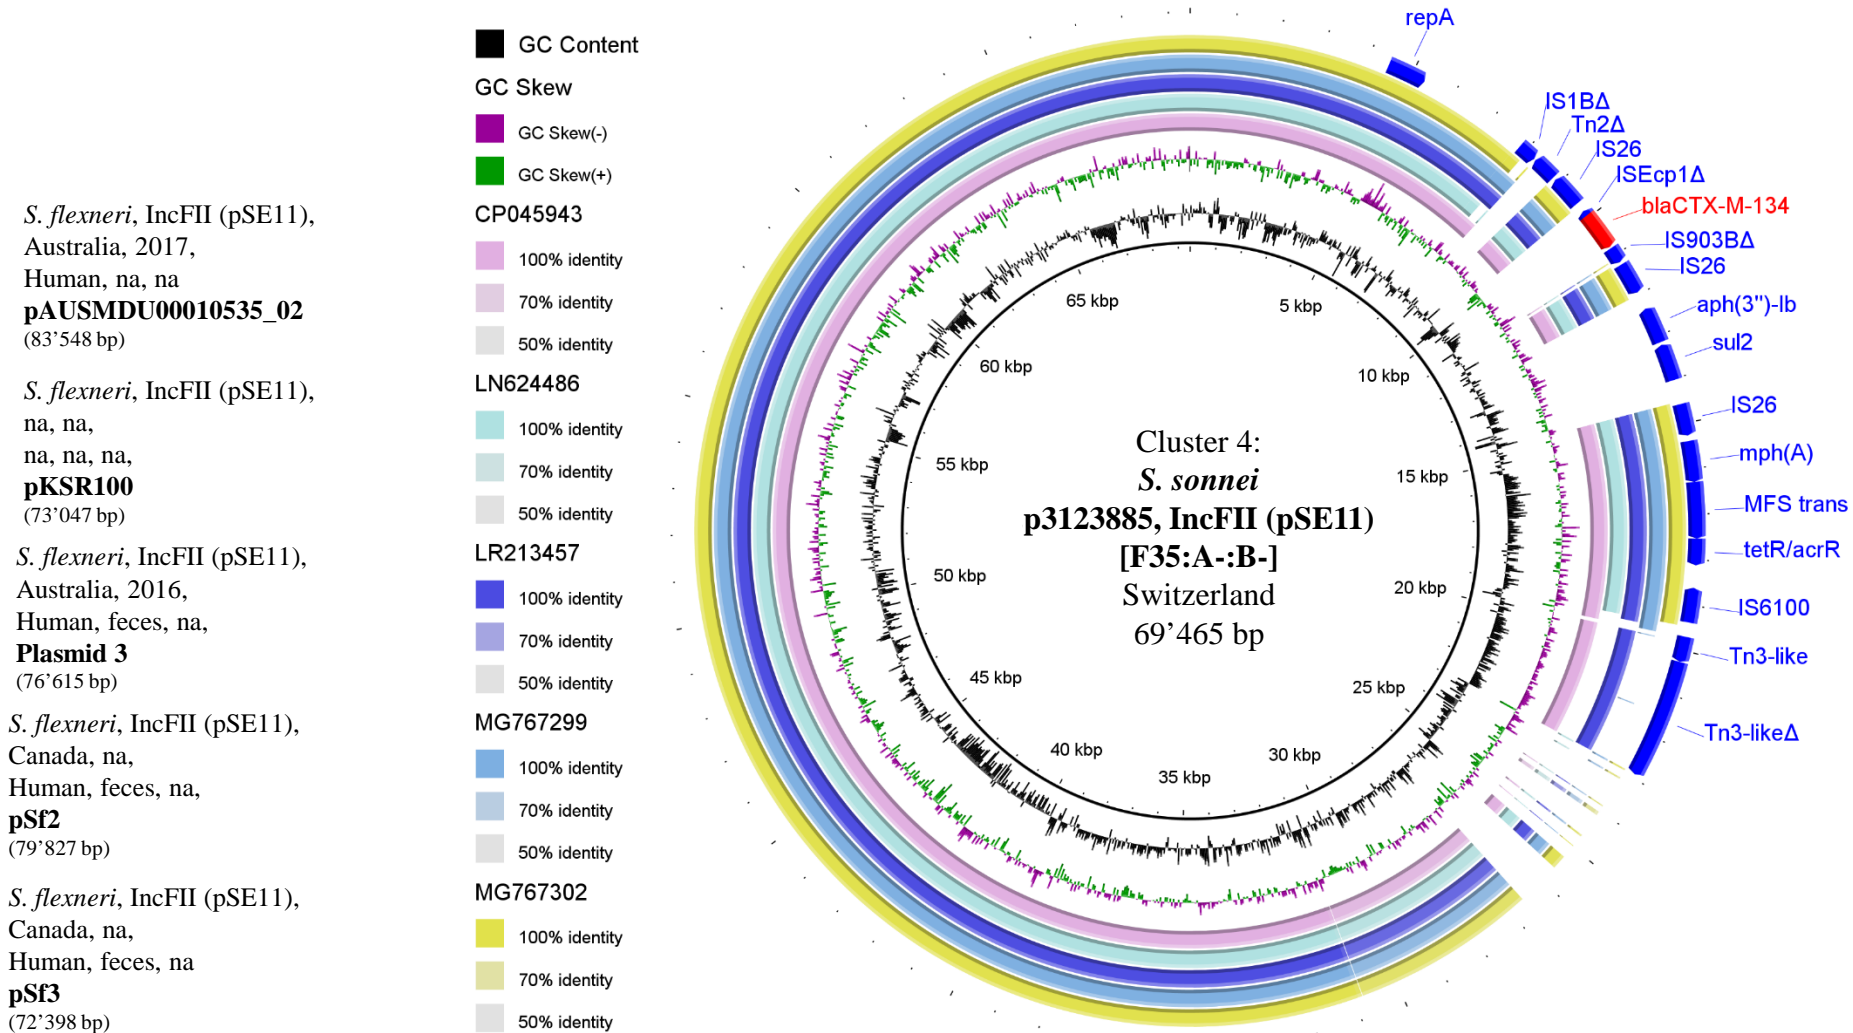

**Figure S4.** BLAST comparisons of *S. sonnei* bla<sub>CTX-M-134</sub> carrying IncFII (pSE11) plasmid against five best overall-match plasmids. Rings were constructed using BRIG (BLAST Ring Image Generator) v0.95 software using p3123885 (GenBank: CP049164) as reference sequence. Similarities with the reference plasmid are represented by the colored rings. From the center to outside: p3123885, GC content, GC skew, pAUSMDU00010535\_02; pKSR100, Plasmid 3, pSf2, pSf3. Genome accession numbers are indicated in the legend. Red and blue arrows above the rings correspond to gene features of interest. Delta symbol (Δ) next to feature label corresponds to partial/incomplete gene CDS. For each plasmid, we report species of isolation, Inc group plasmid, country, year, host, sample of isolation, disease, plasmid name, and plasmid size. Not available = na.



**Table S1.** Antimicrobial susceptibility tests for the *S. sonnei* isolates collected during 2016-2019 in Switzerland and analyzed in the present study

| <i>S. sonnei</i> strain   | <i>bla</i> <sub>ESBL</sub>      | MIC, mg/L <sup>a</sup> |     |     |     |      |       |     |     |       |        |     |       |       |    |     |     |     |     |       |       |       |                  |
|---------------------------|---------------------------------|------------------------|-----|-----|-----|------|-------|-----|-----|-------|--------|-----|-------|-------|----|-----|-----|-----|-----|-------|-------|-------|------------------|
|                           |                                 | CAZ                    | CTX | FEP | ATM | PTZ  | TIM   | IMP | MEM | ERT   | DOR    | LEV | CIP   | SXT   | AK | GEN | TOB | DOX | MIN | TIG   | COL   | POL   | AZT <sup>c</sup> |
| L4094                     | <i>bla</i> <sub>CTX-M-3</sub>   | ≤1                     | 16  | ≤2  | 4   | ≤8/4 | ≤16/2 | ≤1  | ≤1  | ≤0.25 | ≤0.125 | ≤1  | ≤0.25 | 1/19  | ≤4 | ≤1  | ≤1  | ≤2  | ≤2  | ≤0.25 | ≤0.25 | ≤0.25 | np               |
| 1205-3131                 | <i>bla</i> <sub>CTX-M-3</sub>   | ≤1                     | 8   | ≤2  | ≤2  | ≤8/4 | ≤16/2 | ≤1  | ≤1  | ≤0.25 | ≤0.125 | ≤1  | ≤0.25 | 2/38  | ≤4 | ≤1  | ≤1  | ≤2  | ≤2  | ≤0.25 | ≤0.25 | ≤0.25 | 12               |
| 7111-69                   | <i>bla</i> <sub>CTX-M-3</sub>   | 2                      | 16  | 4   | 4   | ≤8/4 | 32/2  | ≤1  | ≤1  | ≤0.25 | ≤0.125 | ≤1  | ≤0.25 | 2/38  | ≤4 | ≤1  | ≤1  | ≤2  | ≤2  | ≤0.25 | ≤0.25 | ≤0.25 | np               |
| 509-1022                  | <i>bla</i> <sub>CTX-M-3</sub>   | 2                      | 16  | 4   | 8   | ≤8/4 | 32/2  | ≤1  | ≤1  | ≤0.25 | ≤0.125 | ≤1  | ≤0.25 | >4/76 | ≤4 | ≤1  | ≤1  | 16  | ≤2  | ≤0.25 | ≤0.25 | ≤0.25 | np               |
| 19-0822-3296              | <i>bla</i> <sub>CTX-M-3</sub>   | 2                      | 32  | 8   | 8   | ≤8/4 | 32/2  | ≤1  | ≤1  | ≤0.25 | ≤0.125 | ≤1  | ≤0.25 | >4/76 | 8  | ≤1  | 2   | >16 | 4   | 0.5   | ≤0.25 | ≤0.25 | np               |
| LC-1477-18 <sup>b</sup>   | <i>bla</i> <sub>CTX-M-3</sub>   | 2                      | 16  | 4   | 4   | ≤8/4 | ≤16/2 | ≤1  | ≤1  | ≤0.25 | ≤0.125 | ≤1  | ≤0.25 | >4/76 | ≤4 | ≤1  | ≤1  | 16  | ≤2  | ≤0.25 | ≤0.25 | ≤0.25 | 12               |
| 6607-69                   | <i>bla</i> <sub>CTX-M-15</sub>  | >16                    | >32 | 8   | >16 | ≤8/4 | ≤16/2 | ≤1  | ≤1  | ≤0.25 | ≤0.125 | ≤1  | ≤0.25 | >4/76 | ≤4 | ≤1  | ≤1  | 16  | 4   | 0.5   | ≤0.25 | ≤0.25 | np               |
| 19-0821-3486              | <i>bla</i> <sub>CTX-M-15</sub>  | ≤1                     | 16  | ≤2  | 4   | ≤8/4 | ≤16/2 | ≤1  | ≤1  | ≤0.25 | ≤0.125 | ≤1  | ≤0.25 | >4/76 | ≤4 | ≤1  | ≤1  | >16 | 4   | ≤0.25 | ≤0.25 | ≤0.25 | np               |
| 0401930105                | <i>bla</i> <sub>CTX-M-15</sub>  | ≤1                     | 8   | ≤2  | 4   | ≤8/4 | ≤16/2 | ≤1  | ≤1  | ≤0.25 | ≤0.125 | ≤1  | ≤0.25 | >4/76 | ≤4 | ≤1  | ≤1  | 16  | ≤2  | ≤0.25 | ≤0.25 | ≤0.25 | np               |
| 6904-27                   | <i>bla</i> <sub>CTX-M-15</sub>  | 2                      | 8   | ≤2  | 4   | ≤8/4 | ≤16/2 | ≤1  | ≤1  | ≤0.25 | ≤0.125 | ≤1  | ≤0.25 | >4/76 | ≤4 | ≤1  | ≤1  | 16  | ≤2  | ≤0.25 | ≤0.25 | ≤0.25 | np               |
| 19-1125-3493              | <i>bla</i> <sub>CTX-M-15</sub>  | 2                      | 8   | ≤2  | ≤2  | ≤8/4 | ≤16/2 | ≤1  | ≤1  | ≤0.25 | ≤0.125 | ≤1  | ≤0.25 | >4/76 | ≤4 | ≤1  | ≤1  | 16  | 4   | ≤0.25 | ≤0.25 | ≤0.25 | np               |
| 19-0820-1561 <sup>d</sup> | <i>bla</i> <sub>CTX-M-15</sub>  | 2                      | 16  | ≤2  | 8   | ≤8/4 | ≤16/2 | ≤1  | ≤1  | ≤0.25 | ≤0.125 | >8  | >2    | >4/76 | ≤4 | ≤1  | ≤1  | ≤2  | ≤2  | 0.5   | ≤0.25 | ≤0.25 | >128             |
| 0401952027 <sup>d</sup>   | <i>bla</i> <sub>CTX-M-55</sub>  | 8                      | >32 | 4   | >16 | ≤8/4 | ≤16/2 | ≤1  | ≤1  | ≤0.25 | ≤0.125 | ≤1  | ≤0.25 | >4/76 | ≤4 | ≤1  | ≤1  | 16  | 4   | ≤0.25 | ≤0.25 | ≤0.25 | >128             |
| 09163633                  | <i>bla</i> <sub>CTX-M-27</sub>  | 4                      | >32 | ≤2  | 8   | ≤8/4 | ≤16/2 | ≤1  | ≤1  | ≤0.25 | ≤0.125 | ≤1  | ≤0.25 | >4/76 | ≤4 | ≤1  | ≤1  | 16  | ≤2  | ≤0.25 | ≤0.25 | ≤0.25 | np               |
| 3123885 <sup>d</sup>      | <i>bla</i> <sub>CTX-M-134</sub> | ≤1                     | 16  | ≤2  | ≤2  | ≤8/4 | ≤16/2 | ≤1  | ≤1  | ≤0.25 | ≤0.125 | 4   | >2    | >4/76 | ≤4 | ≤1  | ≤1  | 16  | 4   | 0.5   | ≤0.25 | ≤0.25 | >128             |
| 7103-58 <sup>d</sup>      | -                               | ≤1                     | ≤1  | ≤2  | ≤2  | ≤8/4 | ≤16/2 | ≤1  | ≤1  | ≤0.25 | ≤0.125 | 8   | >2    | >4/76 | ≤4 | ≤1  | ≤1  | 16  | 4   | 0.5   | ≤0.25 | ≤0.25 | >128             |
| 7103-28 <sup>d</sup>      | -                               | ≤1                     | ≤1  | ≤2  | ≤2  | ≤8/4 | ≤16/2 | ≤1  | ≤1  | ≤0.25 | ≤0.125 | 4   | >2    | >4/76 | ≤4 | ≤1  | ≤1  | 16  | ≤2  | ≤0.25 | ≤0.25 | ≤0.25 | >128             |
| 6407-57 <sup>d</sup>      | -                               | ≤1                     | ≤1  | ≤2  | ≤2  | ≤8/4 | ≥32/2 | ≤1  | ≤1  | ≤0.25 | ≤0.125 | 8   | >2    | >4/76 | ≤4 | ≤1  | ≤1  | 16  | 4   | 0.5   | ≤0.25 | ≤0.25 | >128             |
| 6110-62                   | -                               | ≤1                     | ≤1  | ≤2  | ≤2  | ≤8/4 | ≤16/2 | ≤1  | ≤1  | ≤0.25 | ≤0.125 | ≤1  | ≤0.25 | >4/76 | ≤4 | ≤1  | ≤1  | ≤2  | ≤2  | ≤0.25 | ≤0.25 | ≤0.25 | np               |
| 6105-15                   | -                               | ≤1                     | ≤1  | ≤2  | ≤2  | ≤8/4 | ≤16/2 | ≤1  | ≤1  | ≤0.25 | ≤0.125 | ≤1  | ≤0.25 | >4/76 | ≤4 | ≤1  | ≤1  | 16  | 4   | 0.5   | ≤0.25 | ≤0.25 | np               |
| 6101-40                   | -                               | ≤1                     | ≤1  | ≤2  | ≤2  | ≤8/4 | ≤16/2 | ≤1  | ≤1  | ≤0.25 | ≤0.125 | ≤1  | ≤0.25 | >4/76 | ≤4 | ≤1  | ≤1  | 16  | 4   | 0.5   | ≤0.25 | ≤0.25 | np               |
| 6412-75                   | -                               | ≤1                     | ≤1  | ≤2  | ≤2  | ≤8/4 | ≤16/2 | ≤1  | ≤1  | ≤0.25 | ≤0.125 | 4   | >2    | 2/38  | ≤4 | ≤1  | ≤1  | ≤2  | ≤2  | ≤0.25 | ≤0.25 | ≤0.25 | np               |
| 6502-32                   | -                               | ≤1                     | ≤1  | ≤2  | ≤2  | ≤8/4 | ≤16/2 | ≤1  | ≤1  | ≤0.25 | ≤0.125 | ≤1  | ≤0.25 | >4/76 | ≤4 | ≤1  | ≤1  | 16  | 4   | 0.5   | ≤0.25 | ≤0.25 | np               |
| 7111-23                   | -                               | ≤1                     | ≤1  | ≤2  | ≤2  | ≤8/4 | ≤16/2 | ≤1  | ≤1  | ≤0.25 | ≤0.125 | ≤1  | ≤0.25 | >4/76 | ≤4 | ≤1  | ≤1  | ≤2  | ≤2  | ≤0.25 | ≤0.25 | ≤0.25 | np               |
| 7109-28                   | -                               | ≤1                     | ≤1  | ≤2  | ≤2  | ≤8/4 | ≤16/2 | ≤1  | ≤1  | ≤0.25 | ≤0.125 | ≤1  | ≤0.25 | >4/76 | ≤4 | ≤1  | ≤1  | 8   | ≤2  | 0.5   | ≤0.25 | ≤0.25 | np               |
| 7001-38                   | -                               | ≤1                     | ≤1  | ≤2  | ≤2  | ≤8/4 | ≤16/2 | ≤1  | ≤1  | ≤0.25 | ≤0.125 | ≤1  | ≤0.25 | >4/76 | ≤4 | ≤1  | ≤1  | ≤2  | ≤2  | ≤0.25 | ≤0.25 | ≤0.25 | np               |

**Note.** Antibiotics (susceptibility MIC cutoff in mg/L, according to EUCAST 2019): CAZ, ceftazidime (≤1); CTX, cefotaxime (≤1); FEP, cefepime (≤1); ATM, aztreonam (≤1); TIM, ticarcillin-clavulanate (≤8); PTZ, piperacillin-tazobactam (≤8); IMP, imipenem (≤2); MEM, meropenem (≤2); ERT, ertapenem (≤0.5); DOR, doripenem (not available); LEV, levofloxacin (≤0.25); CIP, ciprofloxacin (≤0.25); SXT, trimethoprim-sulfamethoxazole (≤2/38); AK, amikacin (≤8); GEN, gentamicin (≤2); TOB, tobramycin (≤2); DOX, doxycycline (not available); MIN, minocycline (not available); TIG, tigecycline (≤0.5 for *E. coli* and *Citrobacter koseri*); COL, colistin (≤2); POL, polymyxin B (not available); AZT, azithromycin (≤16); np, not performed

<sup>a</sup> All MICs obtained using GNX2F Sensititre panels

<sup>b</sup> This strain was detected in Italy

<sup>c</sup> MICs were obtained implementing the Etest

<sup>d</sup> These strains possessed genes conferring resistance to macrolides [i.e., *erm(B)* and/or *mph(A)*], therefore MIC for AZT was tested
